# Supplementary material
Source: PubMed Central journal article supplement (PMC4348754)
Supplement: supp_pp.114.249904_249904Supplemental_Data.pdf [file supp_pp.114.249904_249904Supplemental_Data.pdf]

## Supplemental Data

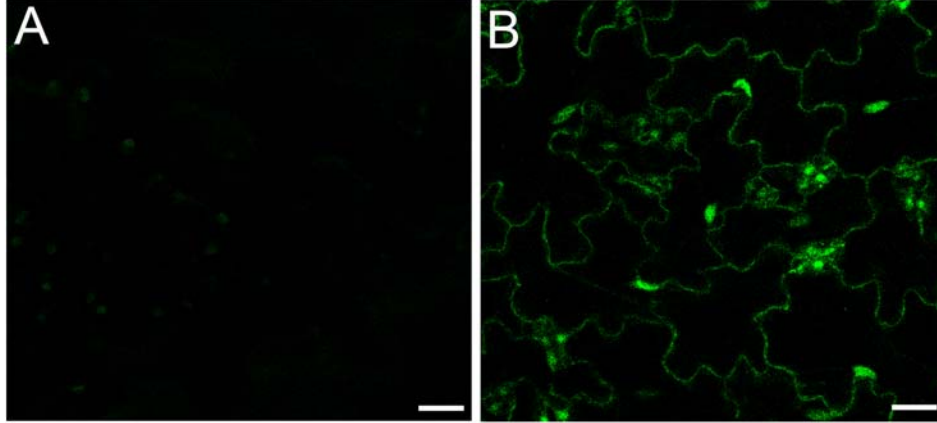

**Supplemental Figure S1.** Tissue-specific expression of TOPP4 protein. We found that TOPP4 is expressed in leaf PCs using the *TOPP4:TOPP4-GFP* transgenic line. (A) Wild-type control, (B) *TOPP4:TOPP4-GFP* transgenic line. Scale bar = 40  $\mu\text{m}$ .

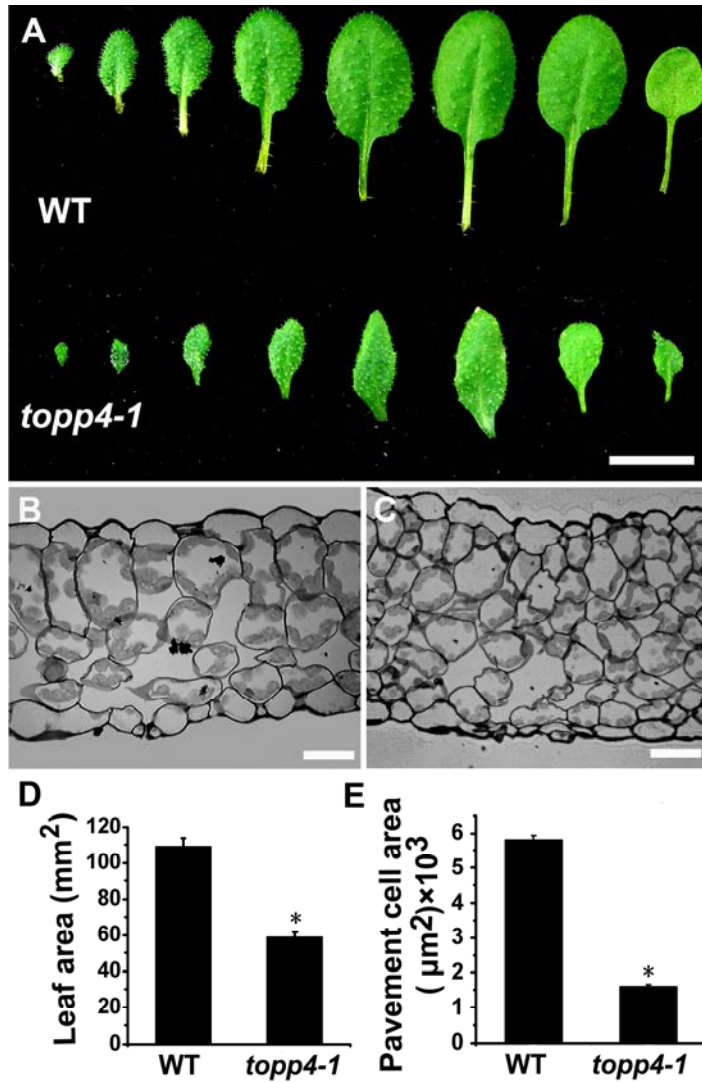

**Supplemental Figure S2.** The rosette leaf phenotypes of *topp4-1*.

(A) The rosette leaves excised from 21-day-old wild-type plants and *topp4-1* mutants. Scale bar = 1 cm.

(B) and (C) Semi-thin transverse sections of the third leaves showed that more cells were formed in *topp4-1* compared to wild type. Scale bars = 10 μm.

(D) Quantitative analyses of the third leaf area.

(E) Quantitative analyses of the PC area. Asterisks in (D) and (E) represent statistic difference from wild type based on Student's *t* test with  $P < 0.01$ . Error bars represent SE ( $n = 100$ ).

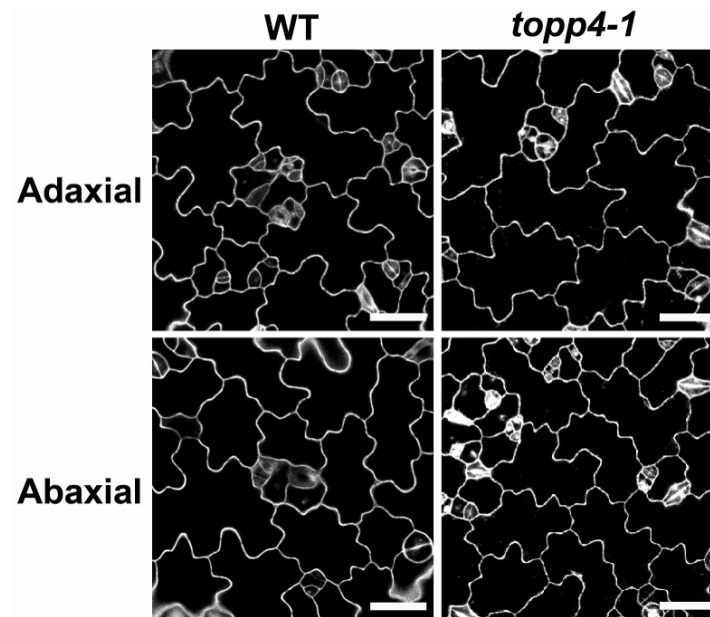

**Supplemental Figure S3.** The cotyledon PCs show normal shape in *topp4-1*. Scale bars = 50  $\mu$ m.

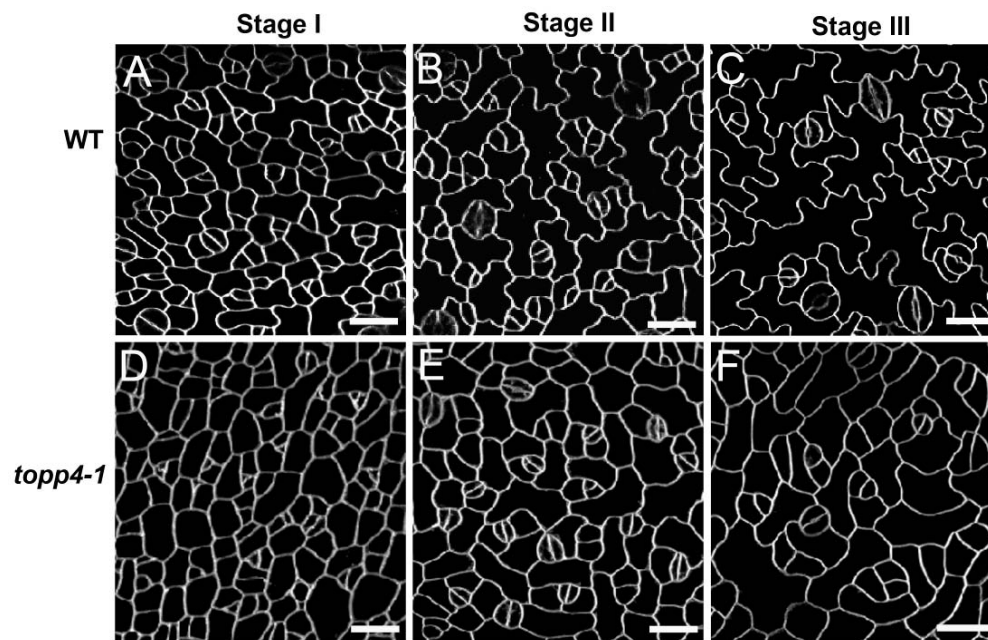

**Supplemental Figure S4.** Effect of *TOPP4* mutation on PC development at different stages.

(A) –(C) Wild-type PCs on the adaxial leaf side.

(D) –(F) The *topp4-1* PCs on the adaxial leaf side. Scale bars = 50  $\mu\text{m}$ .

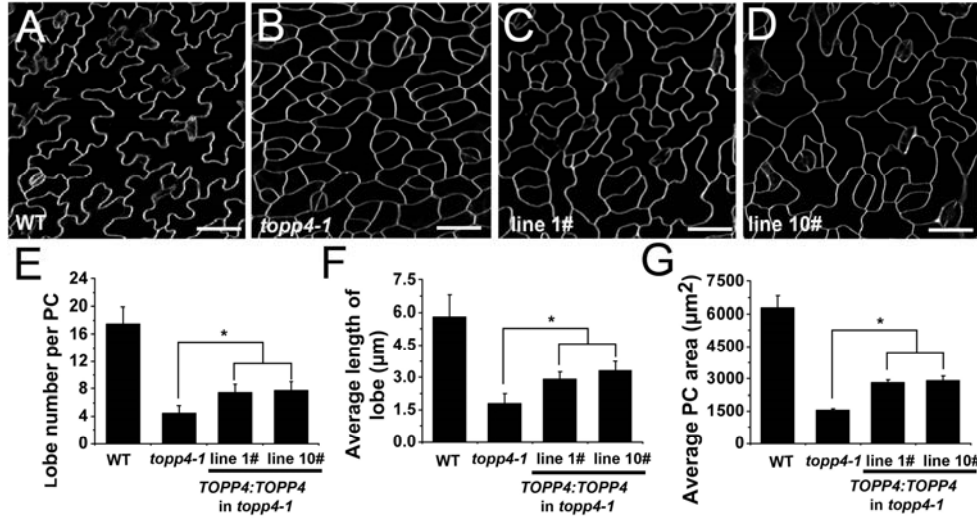

**Supplemental Figure S5.** Transformed *TOPP4:TOPP4* into the *topp4-1* mutant slightly rescues the mutant phenotype.

(A)–(D) The *topp4-1* mutant was transformed with *TOPP4* driven by its native promoter. The adaxial sides of the third leaves in two transgenic lines (1# and 10#) displayed shallower lobe PCs compared to wild type.

(E) and (F) Quantitative analyses of lobe number (E) and lobe length (F) in wild type, *topp4-1*, and line 1# and 10#.

(G) Quantitative analyses of the PC area in wild type, *topp4-1*, and line 1# and 10#.

Asterisks in (E)–(G) represent statistic differences from the *topp4-1* mutant based on Student's *t* test with  $P < 0.05$ . Error bars represent SE ( $n = 100$ ).

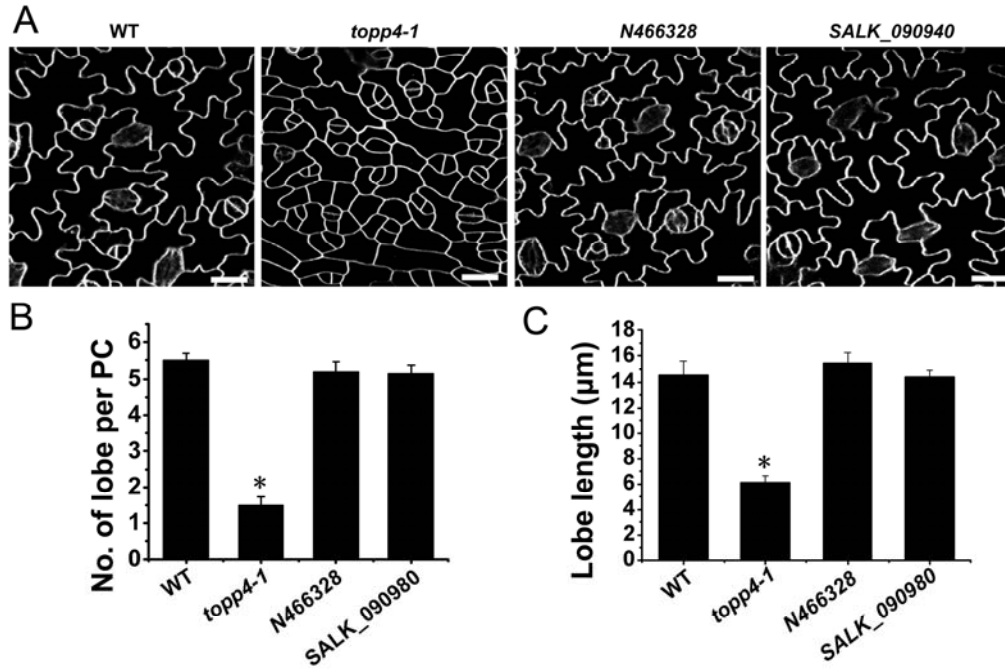

**Supplemental Figure S6.** Phenotype analysis of two T-DNA insertion alleles of *TOPP4*. (A) PCs on the adaxial leaf side in wild type, *topp4-1* and two T-DNA insertion lines of *TOPP4*. Scale bars = 25  $\mu\text{m}$ .

(B) and (C) Quantitative analyses of the lobe number (E) and lobe length (F) in wild type, *topp4-1* and two T-DNA insertion lines of *TOPP4*. Asterisk represents statistic difference from wild type based on Student's *t* test with  $P < 0.01$ . Error bars represent SE (n = 100).

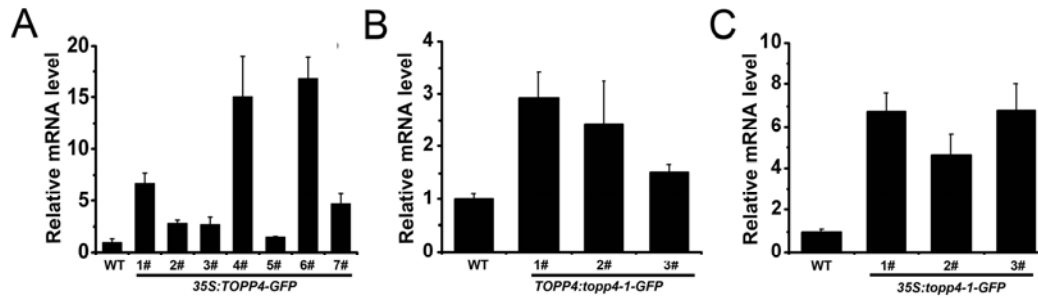

**Supplemental Figure S7.** The *TOPP4/topp4-1* expression levels of the *35S:TOPP4*, *TOPP4:topp4-1-GFP*, or *35S:topp4-1-GFP* transgenic plants. (A) The relative expression levels of the *TOPP4* in seven *35S:TOPP4* transgenic lines. (B) The relative expression levels of the *topp4-1/TOPP4* in three *TOPP4:topp4-1-GFP* transgenic lines. (C) The relative expression levels of the *topp4-1/TOPP4* in three *35S:topp4-1-GFP* transgenic lines. The expression level of *TOPP4* in wild type in (A)–(C) was set to 1.0.

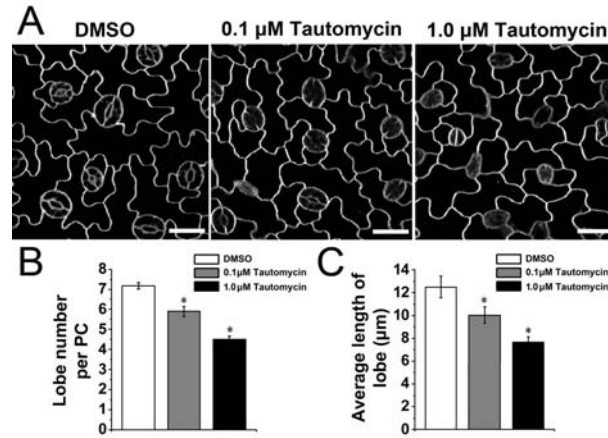

**Supplemental Figure S8.** Inhibition of PP1 partially repressed interdigitated growth of PCs.

(A) The PC shape of adaxial sides of the third leaves. Scale bars = 25  $\mu\text{m}$ .

(B) and (C) Quantitative analyses of lobe number (B) and lobe length (C) of PC. Asterisks represent statistic differences from the control based on Student's *t* test with  $P < 0.01$ . Error bars represent SE ( $n = 100$ ).



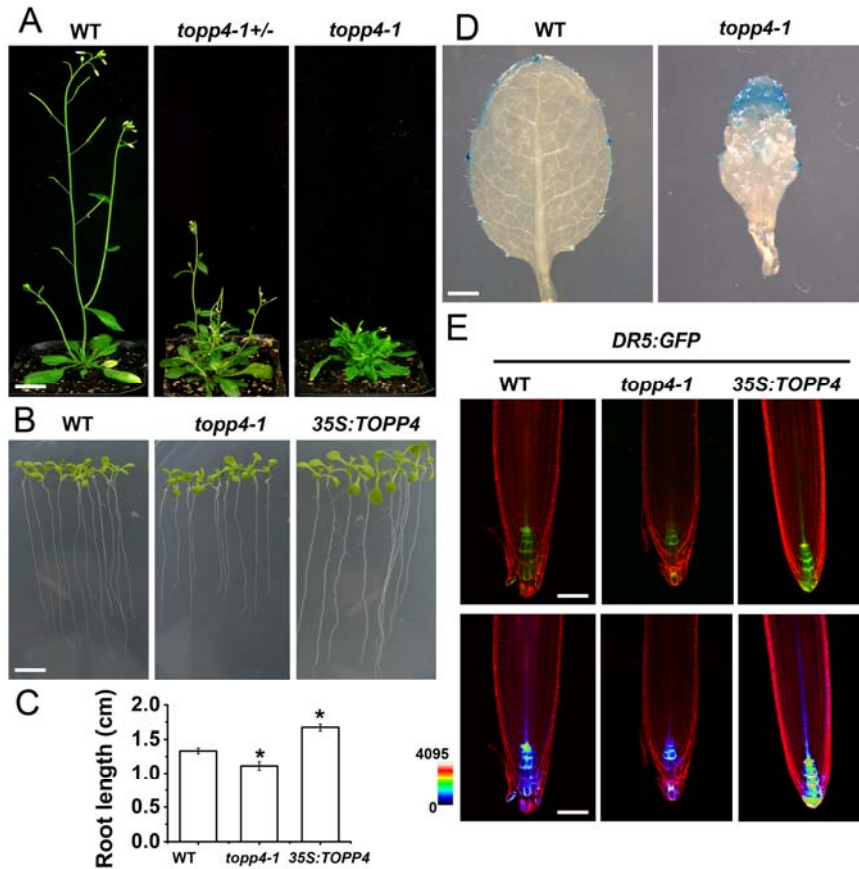

**Supplemental Figure S9.** The *topp4-1* mutant shows auxin-related defects.

(A) Morphology of 6-week-old wild-type, heterozygous *topp4-1+/-* and homozygous *topp4-1* seedlings. The homozygous *topp4-1* showed a lack of apical dominance and more lateral branching than wild type. Scale bar = 1.5 cm.

(B) and (C) Length of primary root on 1/2 MS medium. Scale bar = 0.5 cm. Asterisk represents statistic difference from wild type based on Student's *t* test with  $P < 0.05$ . Error bars represent SE ( $n = 30$ ).

(D) The expression of the DR5-GUS signal in leaves of wild-type and *topp4-1* plants. Scale bar = 0.2 cm.

(E) The expression of the DR5-GFP signal in roots of wild-type, *topp4-1* and *35S:TOPP4* plants. Scale bars = 50  $\mu\text{m}$ .

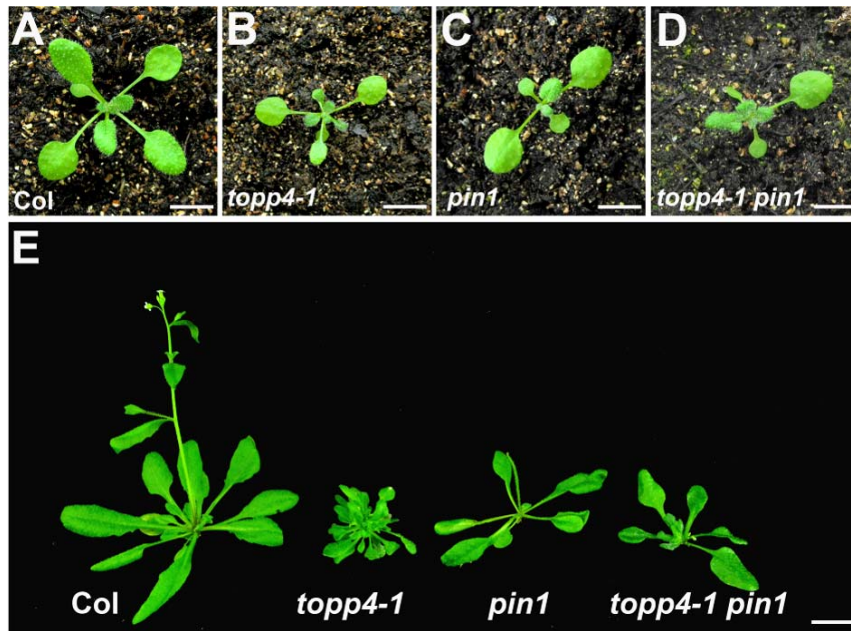

**Supplemental Figure S10.** The phenotype of *topp4-1 pin1* double mutants.

(A)–(D) The leaf phenotype of 21-day-old seedlings of wild-type (A), *topp4-1* (B), *pin1* (C) and *topp4-1 pin1* (D) plants. Scale bars = 1 cm.

(E) The phenotype of 6-week-old seedlings of wild-type, *topp4-1*, *pin1* and *topp4-1 pin1* plants. Scale bar = 0.5 cm.

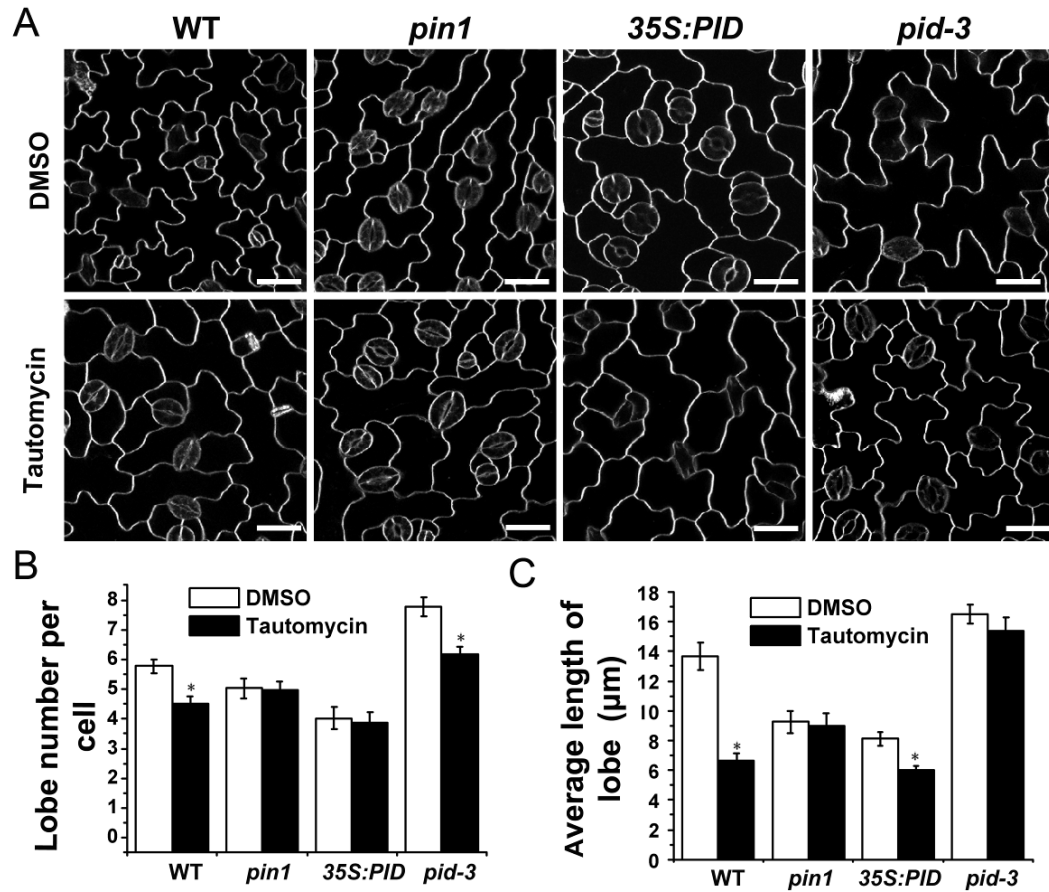

**Supplemental Figure S11.** Effect of tautomycin on PC shape in wild-type, *pin1*, *35S:PID* and *pid-3* plants.

(A) PCs on the adaxial side in wild-type, *pin1*, *35S:PID*, and *pid-3* plants treated with 1.0  $\mu\text{m}$  tautomycin.

(B) Quantitative analyses of lobe number (B) and lobe length (C) of PCs in wild-type, *pin1*, *35S:PID*, and *pid-3* plants treated with 1.0  $\mu\text{m}$  tautomycin. Asterisk represents statistic difference from control based on Student's *t* test with  $P < 0.01$ . Error bars represent SE (n = 100).

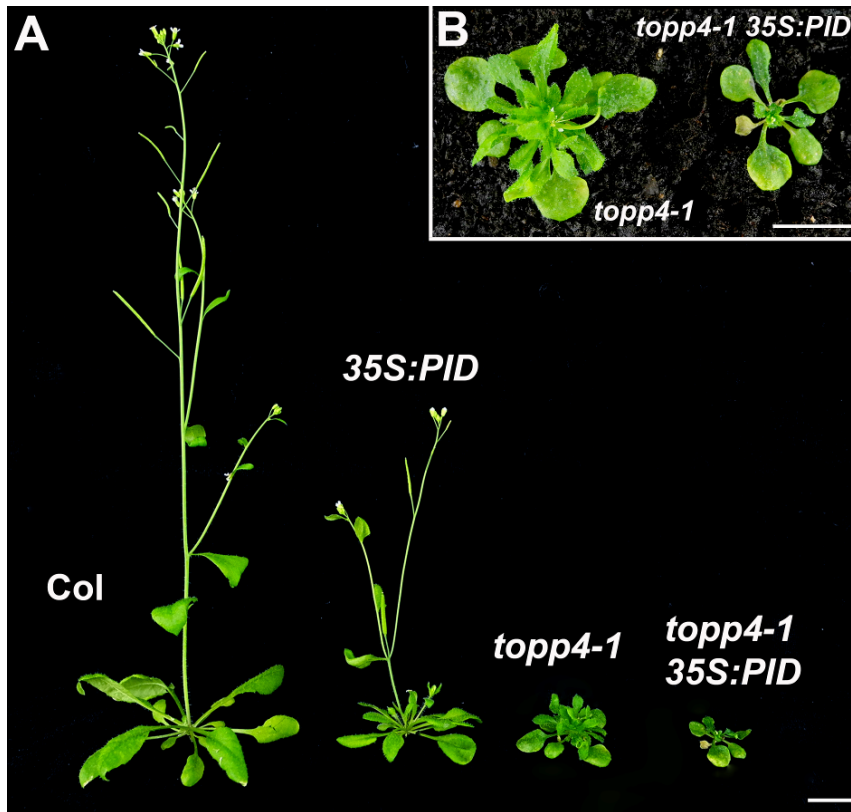

**Supplemental Figure S12.** The phenotype of *topp4-1 35S:PID* double mutants. (A) Seven-week-old plants. (B) Larger image of *topp4-1* and *topp4-1 35S:PID* plants. Scale bars = 0.5 cm.

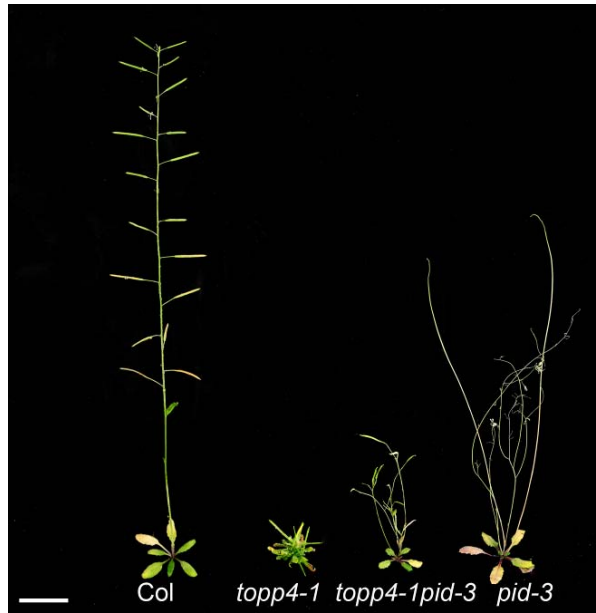

**Supplemental Figure S13.** The phenotype of two-month-old *topp4-1 pid-3* double mutants. Scale bar = 2 cm.

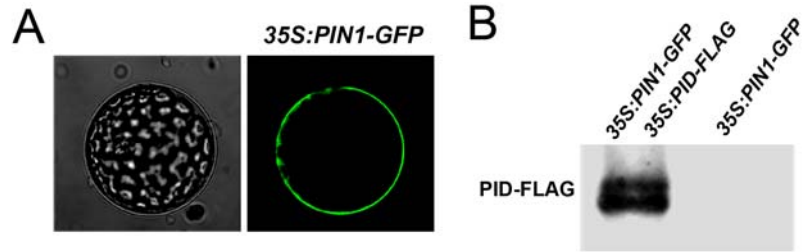

**Supplemental Figure S14.** Transient expression of *35S:PIN1-GFP* and *35S:PID-FLAG* in *Arabidopsis* protoplasts.

(A) Transient expression of *35S:PIN1-GFP* in *Arabidopsis* leaf protoplasts showed that PIN1-GFP is localized predominantly to the plasma membrane.

(B) Western blot demonstrating the PID-FLAG expression in protoplast extracts transfected with *35S:PIN1-GFP* and *35S:PID-FLAG* or without *35S:PID-FLAG* using anti-FLAG antibody.

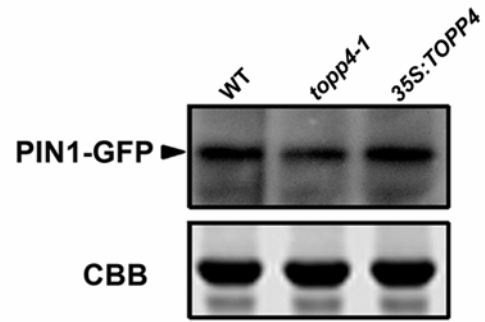

**Supplemental Figure S15.** Immunoblot analyses of PIN1-GFP in wild-type, *topp4-1*, and *35S:TOPP4* plants expressing *PIN1:PIN1-GFP*.

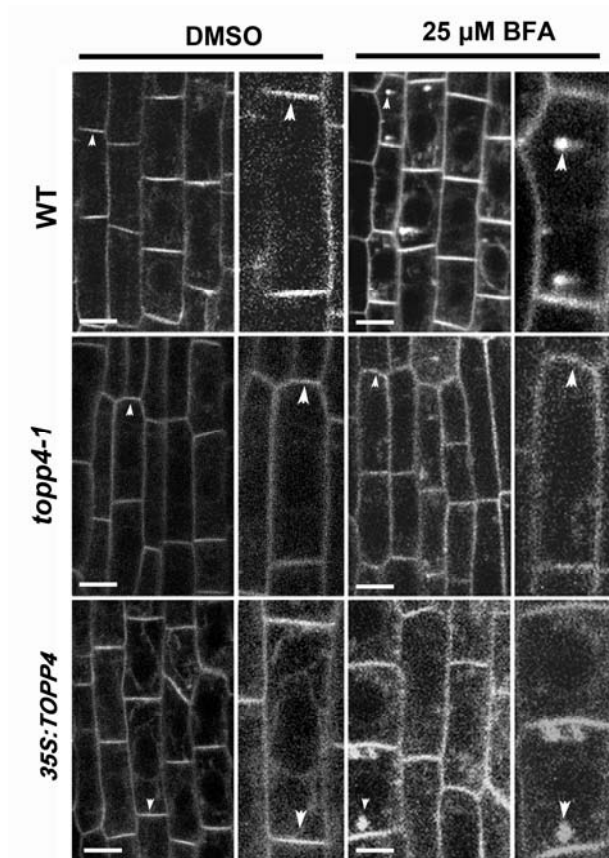

**Supplemental Figure S16.** PIN1 internalization in root cells after BFA treatment. Arrowheads represent the most pronounced localization of PIN1 at the apical/basal cell side or in BFA bodies. Scale bars = 10  $\mu$ m.



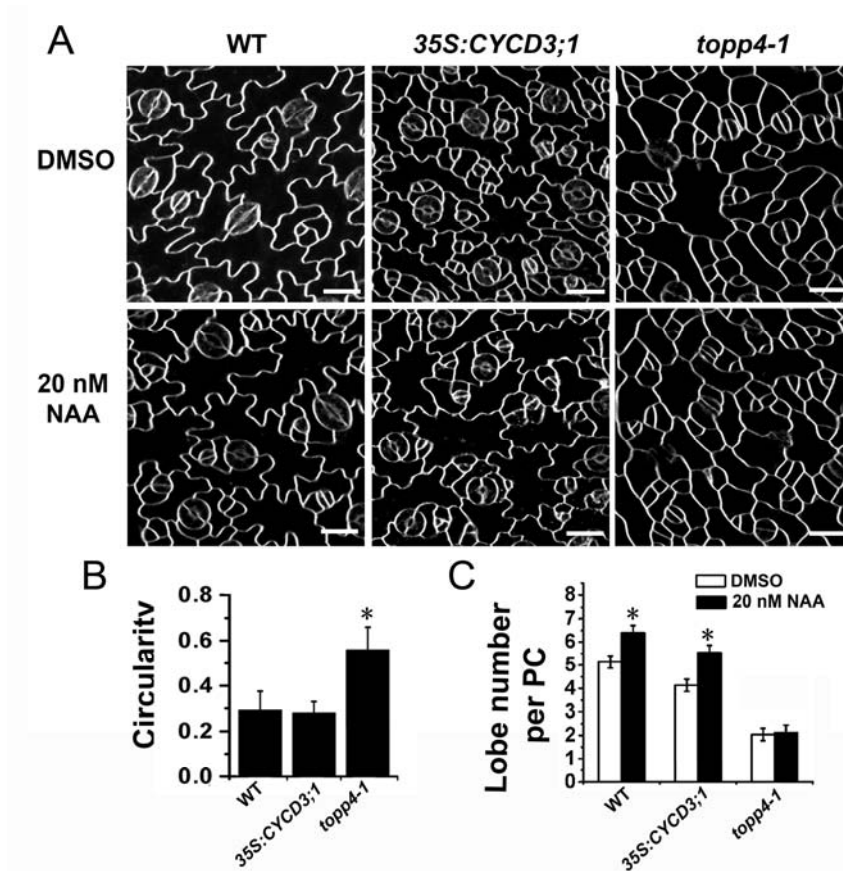

**Supplemental Figure S17.** The effect of exogenous auxin on the PC lobe formation in *35S:CYCD3;1*.

(A) PCs on the adaxial leaf side in wild-type, *35S:CYCD3;1* and *topp4-1* plants treated with DMSO or 20 nM NAA. Scale bars = 20  $\mu$ m.

(B) The circularity values of PCs in wild-type, *35S:CYCD3;1* and *topp4-1* plants.

(C) Analyses of lobe number per PC in wild-type, *35S:CYCD3;1* and *topp4-1* plants treated with DMSO or 20 nM NAA. Asterisks in (B) and (C) represent statistic differences from wild type based on Student's *t* test with  $P < 0.01$ . Error bars represent SE (n = 100).

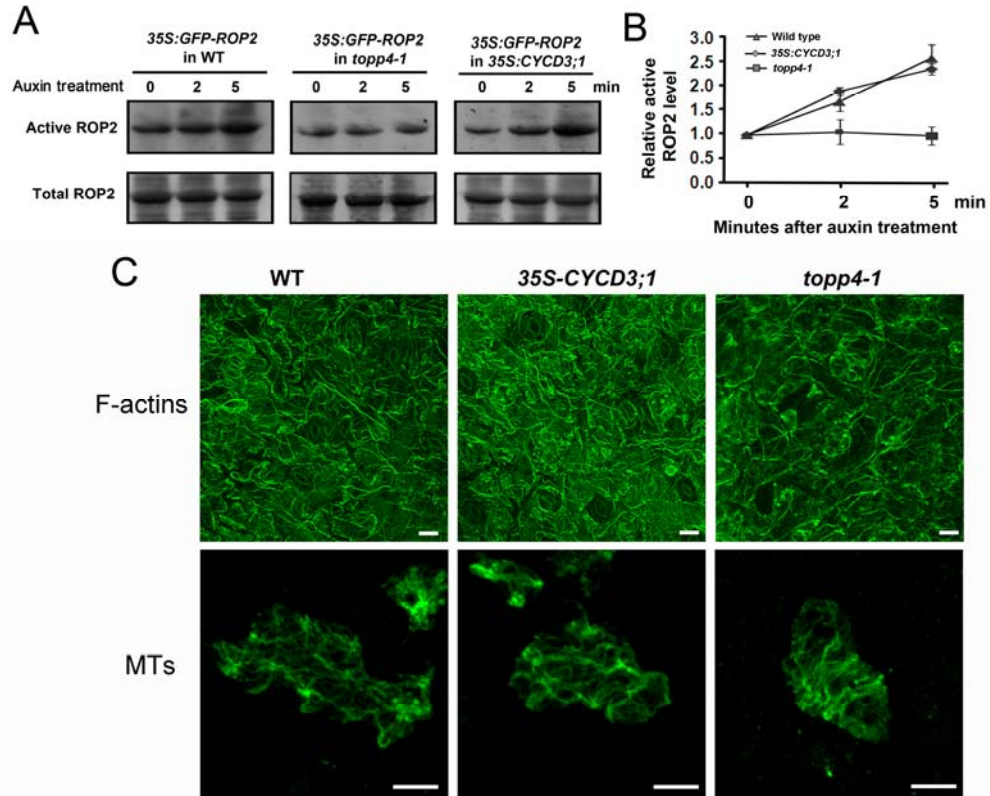

**Supplemental Figure S18.** The effect of auxin on ROP2 activity and the organization of cortical MTs and F-actins in *35S:CYCD3;1*.

(A) Measurements of GTP-bound ROP2 activity in wild-type, *35S:CYCD3;1* and *topp4-1* protoplasts transiently expressing *35S:GFP-ROP2*.

(B) Quantitative analyses of the relative active ROP2 activity. Error bars represent SE (n = 3).

(C) The organization of cortical MTs and F-Actins in the PCs of wild-type, *35S:CYCD3;1* and *topp4-1*. Scale bar= 20  $\mu$ m.

**Supplemental Table S1.** Primers used for plasmid construction and qRT-PCR.

| Primer Name       | Sequence                    |
|-------------------|-----------------------------|
| <i>pid-3-F</i>    | TTAGCTAATGAGTATTTATTTTG     |
| <i>pid-3-R</i>    | AAGATTCAACGGCTGCG           |
| <i>pin1-F</i>     | CAAAAACACCCCCAAAATTTTC      |
| <i>pin1-R</i>     | AATCATCACAGCCACTGATCC       |
| <i>topp4-1-F</i>  | ATGGCGACGACGACGAC           |
| <i>topp4-1-R</i>  | TCCTCCTCCAATCTTTGTG         |
| <i>pA7:PIN1-F</i> | GCGTCGACATGATTACGGCGCGGAC   |
| <i>pA7:PIN1-R</i> | CGGGATCCTAGACCCAAGAGAATGTAG |
| <i>pA7:RIC1-F</i> | GTCGACATGGCGACGACAATGAAG    |
| <i>pA7:RIC1-R</i> | GGATCCGATAATATCGTTACAGG     |
| <i>pA7:RIC4-F</i> | GTCGACATGAGAGATAGAATGGAG    |
| <i>pA7:RIC4-R</i> | GGATCCTAAAGTTGGATGAAGATG    |
| <i>ROP2-RT-F</i>  | CTGGTGTTCCCATATCCTTG        |
| <i>ROP2-RT-R</i>  | CCTCTCCCTGGTTTGTAGTA        |
| <i>ROP4-RT-F</i>  | CACTTCCCTACGGACTATG         |
| <i>ROP4-RT-R</i>  | CACGGTAACTCAACGGTCTT        |
| <i>ROP6-RT-F</i>  | CCACGGATTATGTGCCAACTG       |
| <i>ROP6-RT-R</i>  | ATCTGCACCGCGATAGCTCA        |
